# Supplementary material for: Aerosol responses to precipitation along North American air trajectories arriving at Bermuda
Source: PubMed Central journal article supplement (PMC8609468; doi:10.5194/acp-21-16121-2021), 2021-11-02
Supplement: NIHMS1754081-supplement-Supplement.pdf [file NIHMS1754081-supplement-Supplement.pdf]

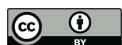

*Supplement of*

## **Aerosol responses to precipitation along North American air trajectories arriving at Bermuda**

**Hossein Dadashazar et al.**

*Correspondence to:* Hossein Dadashazar ([hosseind@arizona.edu](mailto:hosseind@arizona.edu))

The copyright of individual parts of the supplement might differ from the article licence.

26 **Table S1. Seasonal number of points available for various measurements conducted at Fort**  
27 **Prospect in Bermuda between Jan 2015 and Dec 2019. It should be noted that data points**  
28 **correspond to 6-hour resolution for all variables except for PM<sub>10</sub> data that were at daily**  
29 **resolution.**

|                   | DJF  | MAM  | JJA  | SON  |
|-------------------|------|------|------|------|
| NO                | 1340 | 1626 | 1698 | 1758 |
| NO <sub>2</sub>   | 1340 | 1626 | 1698 | 1758 |
| NO <sub>x</sub>   | 1340 | 1626 | 1698 | 1758 |
| PM <sub>2.5</sub> | 1295 | 1761 | 1712 | 1551 |
| PM <sub>10</sub>  | 57   | 66   | 72   | 59   |

30  
31

32  
33

**Table S2. Number of points that were used to calculate statistics presented in Table 2.**

| Parameter                                                                                    | High-rain (APT > 13.5 mm)/Low-rain (APT < 0.9 mm) |         |         |         |
|----------------------------------------------------------------------------------------------|---------------------------------------------------|---------|---------|---------|
|                                                                                              | DJF                                               | MAM     | JJA     | SON     |
| NO (ppbv)                                                                                    | 232/147                                           | 252/206 | 166/112 | 290/141 |
| NO <sub>2</sub> (ppbv)                                                                       | 232/147                                           | 252/206 | 166/112 | 290/141 |
| NO <sub>x</sub> (ppbv)                                                                       | 232/147                                           | 252/206 | 166/112 | 290/141 |
| CO (ppbv)                                                                                    | 356/171                                           | 308/244 | 173/120 | 307/148 |
| PM <sub>2.5</sub> (μg m <sup>-3</sup> )                                                      | 244/132                                           | 290/242 | 168/111 | 255/117 |
| PM <sub>2.5</sub> /ΔCO (μg m <sup>-3</sup> ppbv <sup>-1</sup> )                              | 224/87                                            | 278/209 | 154/78  | 215/98  |
| Sea-Salt (μg m <sup>-3</sup> )                                                               | 356/171                                           | 308/244 | 173/120 | 307/148 |
| Sea-Salt <sub>PM2.5</sub> (μg m <sup>-3</sup> )                                              | 356/171                                           | 308/244 | 173/120 | 307/148 |
| Dust (μg m <sup>-3</sup> )                                                                   | 356/171                                           | 308/244 | 173/120 | 307/148 |
| Dust <sub>PM2.5</sub> (μg m <sup>-3</sup> )                                                  | 356/171                                           | 308/244 | 173/120 | 307/148 |
| Sea-Salt/ΔCO (μg m <sup>-3</sup> ppbv <sup>-1</sup> )                                        | 327/124                                           | 294/210 | 157/85  | 259/124 |
| Sulfate/ΔCO (μg m <sup>-3</sup> ppbv <sup>-1</sup> )                                         | 327/124                                           | 294/210 | 157/85  | 259/124 |
| Dust/ΔCO (μg m <sup>-3</sup> ppbv <sup>-1</sup> )                                            | 327/124                                           | 294/210 | 157/85  | 259/124 |
| BC/ΔCO (μg m <sup>-3</sup> ppbv <sup>-1</sup> )                                              | 327/124                                           | 294/210 | 157/85  | 259/124 |
| OC/ΔCO (μg m <sup>-3</sup> ppbv <sup>-1</sup> )                                              | 327/124                                           | 294/210 | 157/85  | 259/124 |
| Sea-Salt <sub>PM2.5</sub> /ΔCO (μg m <sup>-3</sup> ppbv <sup>-1</sup> )                      | 327/124                                           | 294/210 | 157/85  | 259/124 |
| Dust <sub>PM2.5</sub> /ΔCO (μg m <sup>-3</sup> ppbv <sup>-1</sup> )                          | 327/124                                           | 294/210 | 157/85  | 259/124 |
| Wind <sub>SF</sub> (m s <sup>-1</sup> )                                                      | 356/171                                           | 308/244 | 173/120 | 307/148 |
| APT <sub>6h</sub> (mm)                                                                       | 356/171                                           | 308/244 | 173/120 | 307/148 |
| APT (mm)                                                                                     | 356/171                                           | 308/244 | 173/120 | 307/148 |
|                                                                                              | All                                               |         |         |         |
| V <sub>f</sub> /ΔCO × 10 <sup>4</sup> (μm <sup>3</sup> μm <sup>-2</sup> ppbv <sup>-1</sup> ) | 16/19                                             |         |         |         |
| R <sub>eff-f</sub> (μm)                                                                      | 16/19                                             |         |         |         |
| R <sub>f</sub> (μm)                                                                          | 16/19                                             |         |         |         |
| σ <sub>f</sub>                                                                               | 16/19                                             |         |         |         |
| V <sub>c</sub> /ΔCO × 10 <sup>4</sup> (μm <sup>3</sup> μm <sup>-2</sup> ppbv <sup>-1</sup> ) | 16/19                                             |         |         |         |
| R <sub>eff-c</sub> (μm)                                                                      | 16/19                                             |         |         |         |
| R <sub>c</sub> (μm)                                                                          | 16/19                                             |         |         |         |
| σ <sub>c</sub>                                                                               | 16/19                                             |         |         |         |

34  
35  
36  
37

38 **Table S3. Four APT bin ranges (mm) that were used to create seasonal plots shown in Fig.**  
39 **7.**

| Bin Number | DJF        | MAM        | JJA       | SON        |
|------------|------------|------------|-----------|------------|
| 1          | 0-2.5      | 0-1.4      | 0-1.8     | 0-2.4      |
| 2          | 2.5-6.7    | 1.4-5.3    | 1.8-8.7   | 2.4-7.2    |
| 3          | 6.7-15.7   | 5.3-14.6   | 8.7-19.0  | 7.2-16.0   |
| 4          | 15.7-164.9 | 14.6-118.9 | 19.0-74.2 | 16.0-106.2 |

40

41

42

43 **Table S4. Median values of aerosol parameters and APT for Min. Alt. legs (Fig. 10)**  
 44 **conducted in ACTIVATE's Research Flight 6 on 22 February 2020.**

|    | Parameter                                                 | Min. Alt. 1 | Min. Alt. 2 | Min. Alt. 3 | Min. Alt. 4 |
|----|-----------------------------------------------------------|-------------|-------------|-------------|-------------|
|    | APT (mm)                                                  | 0.0         | 1.8         | 2.4         | 0.6         |
|    | CN <sub>&gt;10nm</sub> (cm <sup>-3</sup> )                | 4938        | 345         | 165         | 1076        |
|    | LAS (cm <sup>-3</sup> )                                   | 360         | 174         | 66          | 550         |
| 45 | LAS <sub>Volume</sub> (μm <sup>3</sup> cm <sup>-3</sup> ) | 2.0         | 0.9         | 0.4         | 1.8         |

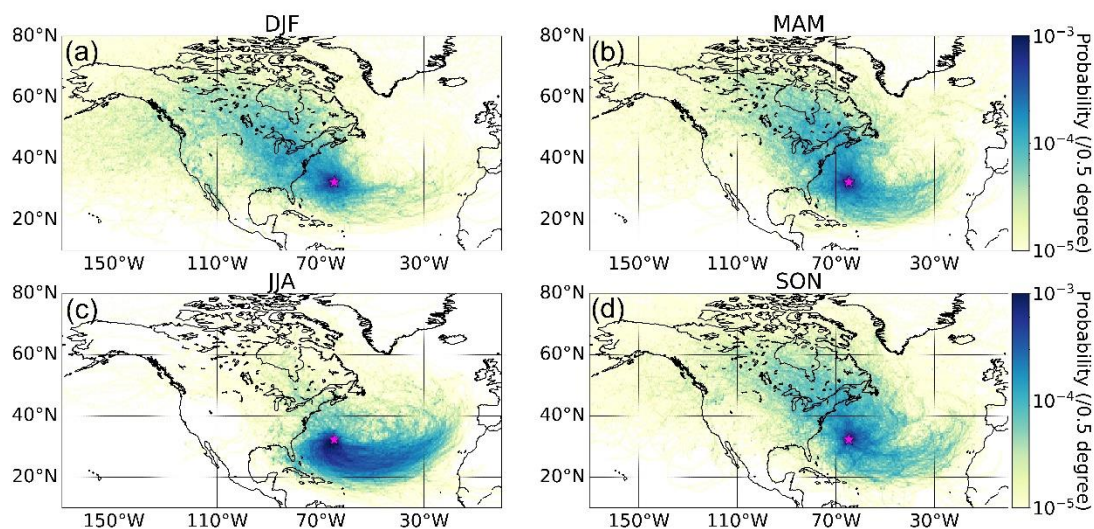

47  
48 **Figure S1. Seasonal maps (a-d) showing the probability density of trajectories calculated**  
49 **based on 10-day HYSPLIT backward trajectories reaching Bermuda (32.30° N, 64.77° W),**  
50 **denoted by the pink star, at 500 m (AGL). This analysis is based on trajectories between 01**  
51 **January 2015 and 31 December 2019.**

52  
53  
54

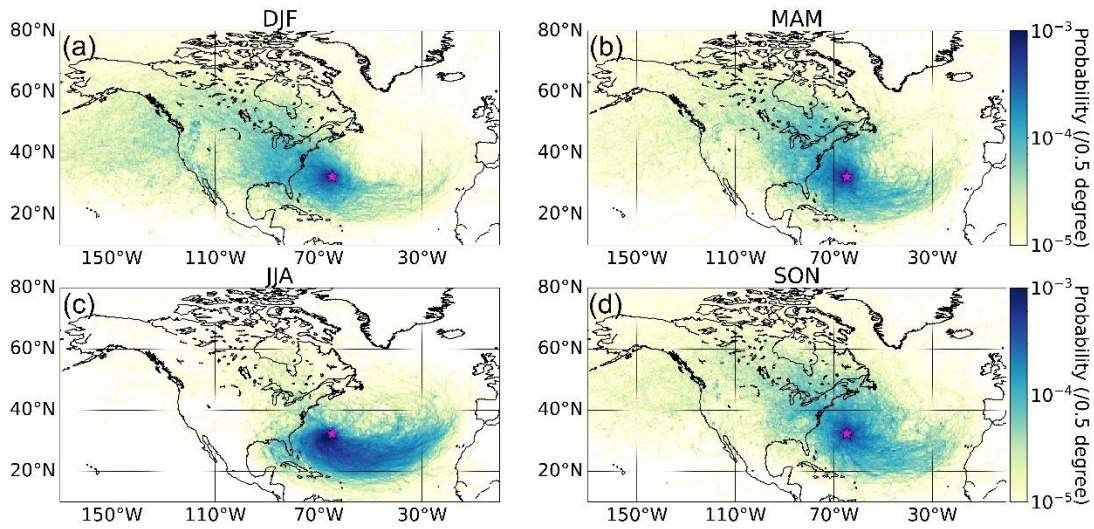

55  
 56 **Figure S2. Seasonal maps (a-d) showing the probability density of trajectories calculated**  
 57 **based on 10-day HYSPLIT backward trajectories reaching Bermuda (32.30° N, 64.77°W),**  
 58 **denoted by the pink star, at 1 km (AGL). This analysis is based on trajectories between 01**  
 59 **January 2015 and 31 December 2019.**  
 60

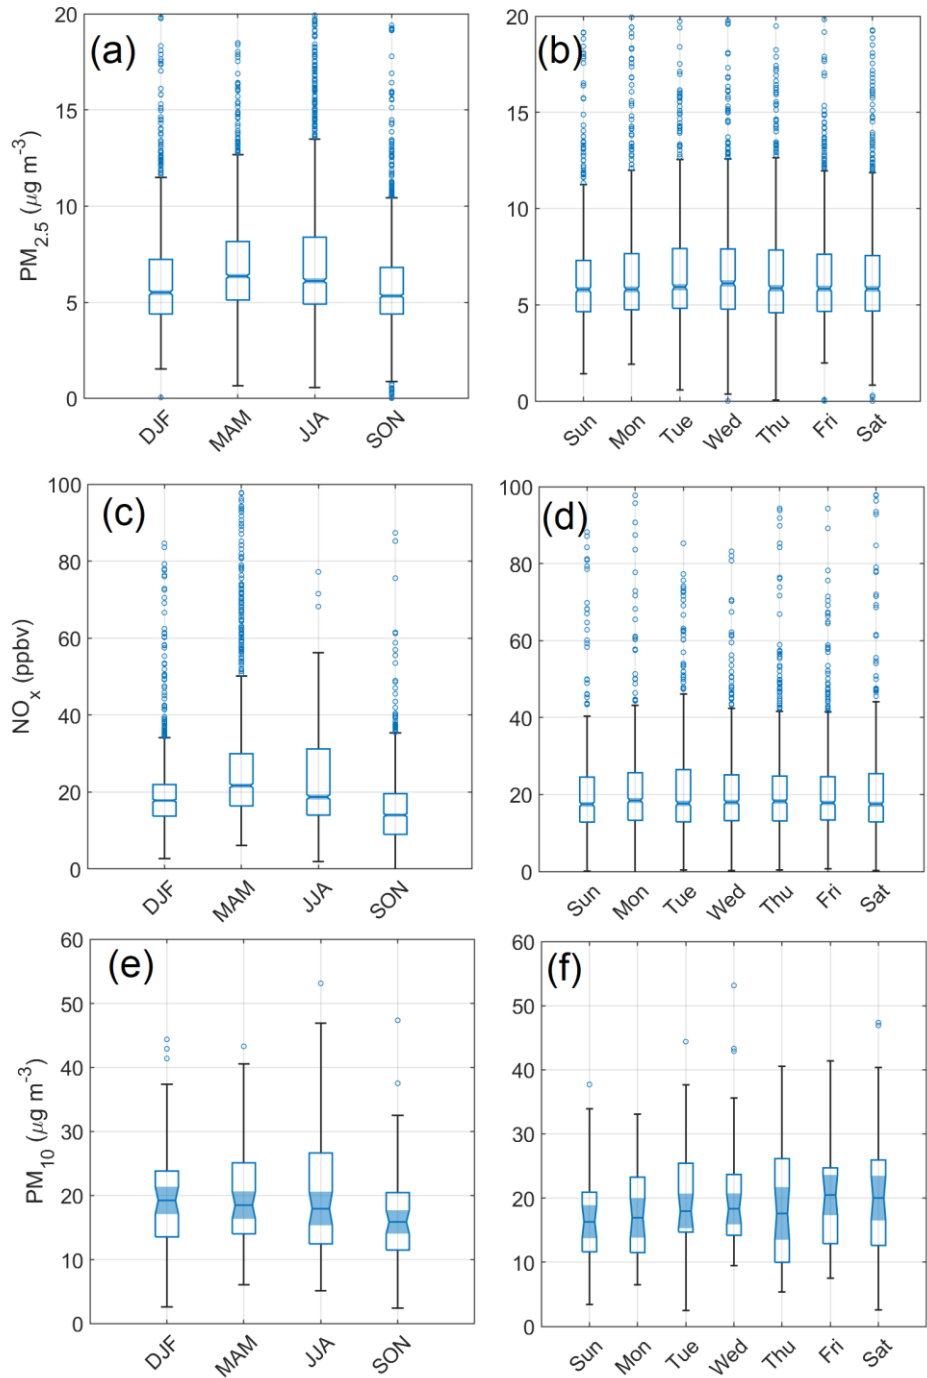

61  
 62 **Figure S3. Seasonal (panels a/c/e) and day-of-week (panels b/d/f) box notch plots of PM<sub>2.5</sub>,**  
 63 **NO<sub>x</sub>, and PM<sub>10</sub> measured at Fort Prospect in Bermuda between 1 January 2015 and 31**  
 64 **December 2019. The middle, bottom, and top lines in each box represent the median, 25<sup>th</sup>**  
 65 **percentile, and 75<sup>th</sup> percentile, respectively. Markers show extreme values identified based**  
 66 **on 1.5×IQR (interquartile range) distance from the top and bottom of each box. Whiskers**  
 67 **represent maximum and minimum values excluding extreme points. Boxes with notches and**  
 68 **shaded regions that do not overlap have different medians at 95% confidence level.**



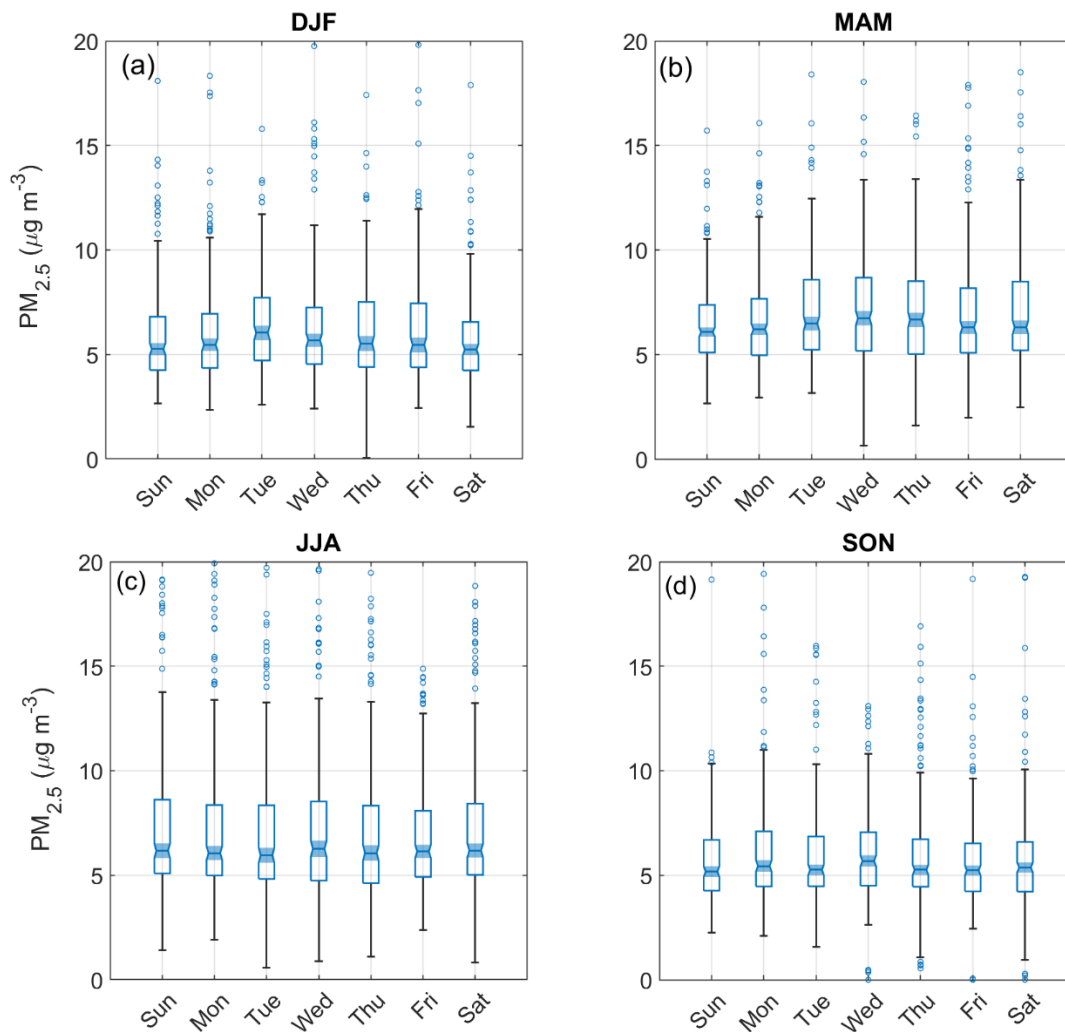

69

70 **Figure S4. Day-of-week box notch plots of PM<sub>2.5</sub> for (a-d) different seasons measured at**  
 71 **Fort Prospect in Bermuda between 1 January 2015 and 31 December 2019.**

72

73

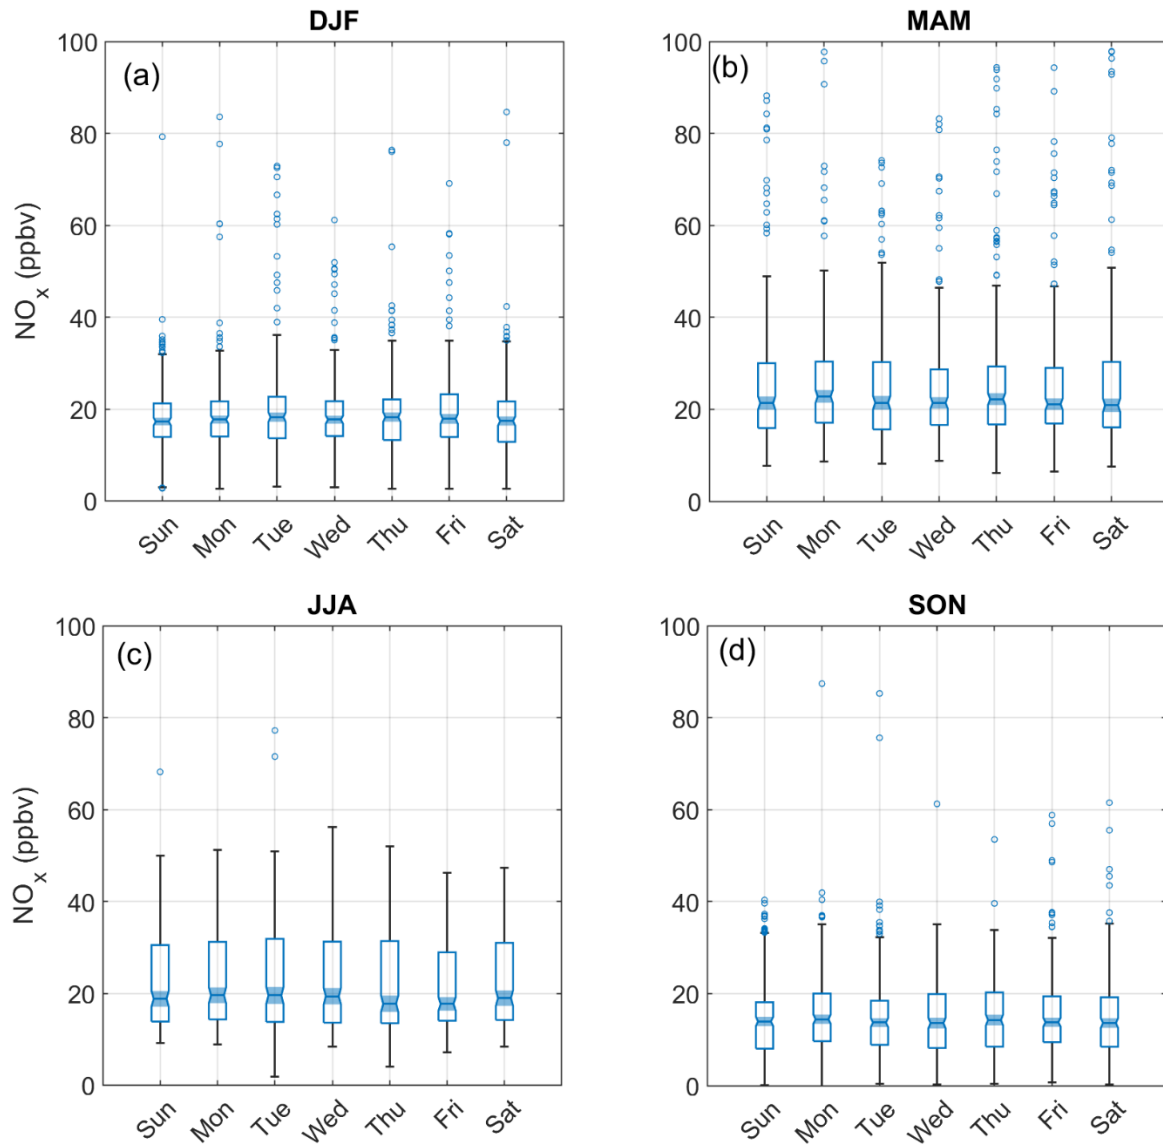

74

75 **Figure S5. Day-of-week box notch plots of NO<sub>x</sub> for (a-d) different seasons measured at Fort**  
 76 **Prospect in Bermuda between 1 January 2015 and 31 December 2019.**

77

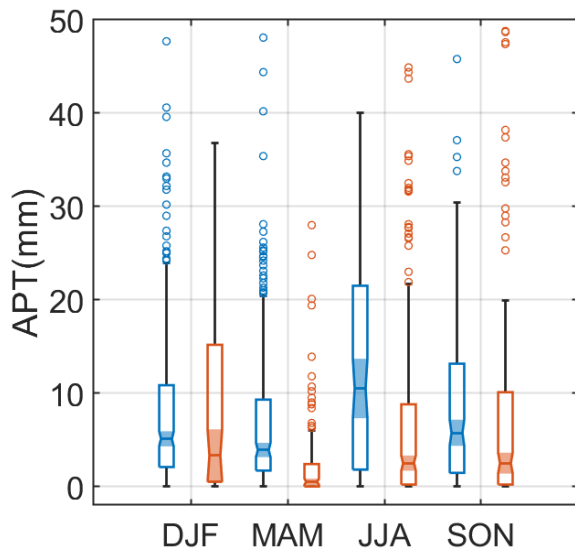

78  
 79 **Figure S6. Box notch plot for each season of year 2017 comparing accumulated precipitation**  
 80 **along trajectories (APT) for Clusters 1 (blue) and 2 (orange) from Fig. 4b. APT values were**  
 81 **estimated from four-day HYSPLIT back trajectories reaching Bermuda (32.30° N, 64.77° W)**  
 82 **at 100 m AGL. The middle, bottom, and top lines in each box represent the median, 25<sup>th</sup>**  
 83 **percentile, and 75<sup>th</sup> percentile, respectively. Markers show extreme values identified based**  
 84 **on 1.5×IQR (interquartile range) distance from the top of each box. Whiskers represent**  
 85 **maximum and minimum values excluding extreme points. Boxes with notches and shaded**  
 86 **regions that do not overlap have different medians at the 95% confidence level.**

87  
 88  
 89

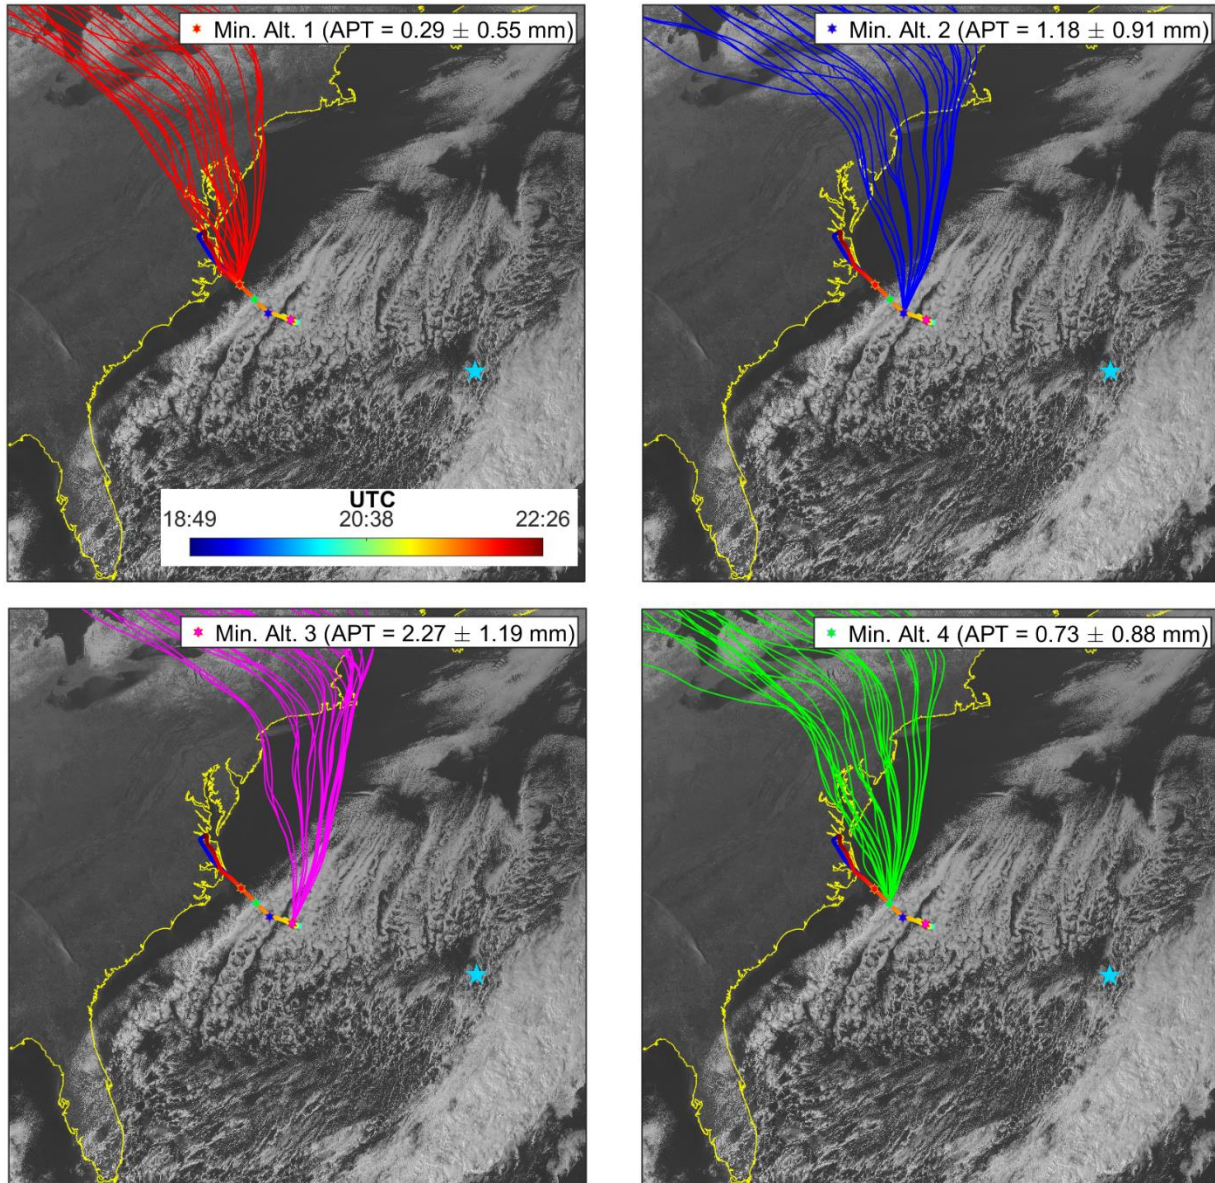

90  
 91 **Figure S7. Trajectory ensembles for (a) Min. Alt. 1, (b) Min. Alt. 2, (c), Min. Alt. 3, and (d)**  
 92 **Min. Alt. 4 legs, conducted by the HU-25 Falcon on 22 February 2020, overlaid on GOES 16**  
 93 **imagery obtained at 19:35:04 (UTC). The trajectory ensembles consisted of 27 individual**  
 94 **trajectories obtained by offsetting the meteorological data by a fixed grid factor. Trajectory**  
 95 **ensembles were calculated for the midpoints of four Min. Alt. legs, which are marked in each**  
 96 **plot. The average ( $\pm$  standard deviation) of accumulated precipitation along the trajectory**  
 97 **(APT) is also shown calculated for the recent history of the sampled air masses when they were**  
 98 **over the ocean (time over land excluded from APT calculations).**
